# Supplementary material for: Synthesis, structural characterisation and bonding in an anionic hexavanadate bearing redox-active ferrocenyl groups at the periphery
Source: Royal Society of Chemistry journal article supplement (doi:10.1039/c0nj00421a), 2010-01-01
Supplement: c0nj00421a.pdf [file c0nj00421a.pdf]

## Electronic Supporting Information

### Synthesis, structural characterisation and bonding in an anionic hexavanadate bearing redox-active ferrocenyl groups at the periphery

Jiří Schulz, Róbert Gyepes, Ivana Císařová and Petr Štěpnička\*

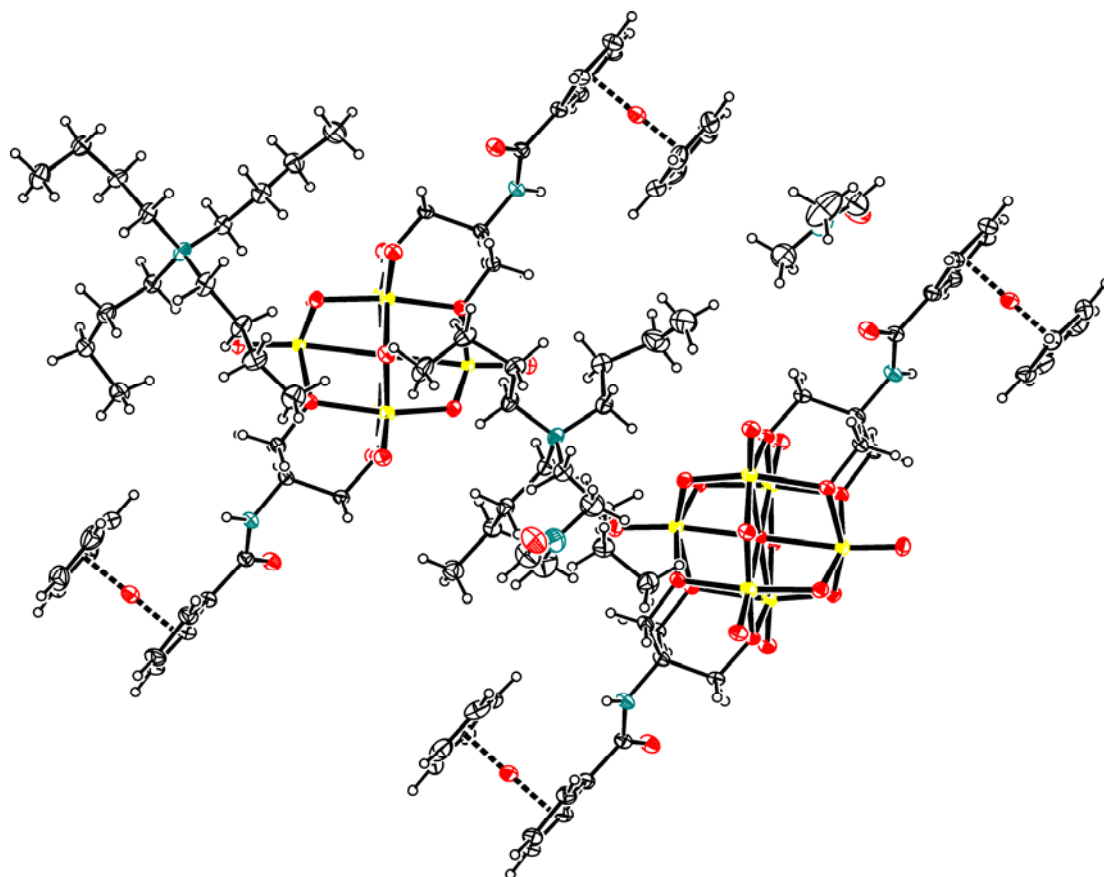

**Figure S1.** 'Full' PLATON plot of the structure of **2a**.

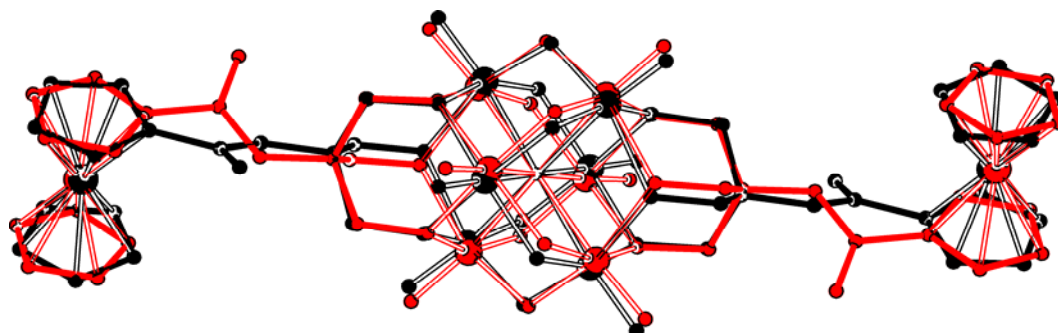

**Figure S2.** Superposition of the two crystallographically independent anion moieties in the structure of **2a** (molecule 2 in red, molecule 1 in black).
